# Supplementary material for: Association of the Great East Japan Earthquake and the Daiichi Nuclear Disaster in Fukushima City, Japan, With Birth Rates
Source: PubMed Central journal article supplement (PMC6484541; doi:10.1001/jamanetworkopen.2018.7455), 2019-01-25
Supplement: jamanetwopen-2-e187455-s001.pdf [file jamanetwopen-2-e187455-s001.pdf]

## Supplementary Online Content

Kurita N. Association of the Great East Japan Earthquake and the Daiichi nuclear disaster in Fukushima City, Japan, with birth rates. *JAMA Netw Open*.

2019;2(1):e187455. doi:10.1001/jamanetworkopen.2018.7455

**eTable 1.** List of the Impact Models and Their Parameters Used in This Study

**eTable 2.** Values of Akaike Information Criterion and Bayesian Information Criterion Calculated From Impact Models for Interrupted Time Series Analysis Using Trimonthly-Averaged Data

**eFigure 1.** Trend in Birth Rates Estimated From Interrupted Time Series Analysis

**eFigure 2.** Trend in Birth Rates Estimated From Interrupted Time Series Analysis Using Trimonthly-Averaged Data

This supplementary material has been provided by the authors to give readers additional information about their work.

**eTable 1.** List of the Impact Models and Their Parameters Used in This Study

| Impact model                                                                                                                                                                                                                                                                                                                                                                                                                                                                                                                                                                                                                                                  | Parameters in the impact model                                                                                                                                                                                                                                                                                                                                                                                                                                                                                                                                                                                                            |
|---------------------------------------------------------------------------------------------------------------------------------------------------------------------------------------------------------------------------------------------------------------------------------------------------------------------------------------------------------------------------------------------------------------------------------------------------------------------------------------------------------------------------------------------------------------------------------------------------------------------------------------------------------------|-------------------------------------------------------------------------------------------------------------------------------------------------------------------------------------------------------------------------------------------------------------------------------------------------------------------------------------------------------------------------------------------------------------------------------------------------------------------------------------------------------------------------------------------------------------------------------------------------------------------------------------------|
| <p><b>Change in level</b></p> $Birth\ rate_t = exp(\beta_0 + \beta_1 T + \beta_2 D_t)$ <p>T: the time in months at time <math>T = t</math> since the start of the observation; <math>D_t</math>: a dummy variable indicating the pre-disaster period (<math>D_t = 0</math> if <math>t \leq</math> February 2011) or the post-disaster period (<math>D_t = 1</math> if <math>t \geq</math> March 2011); <b>Birth rate<sub>t</sub></b>: the monthly birth rate per people at <math>T = t</math>.</p>                                                                                                                                                            | <p>Here, <math>\beta_0</math> represents the intercept at <math>T = 0</math>, <math>\beta_1</math> is interpreted as the change in birth rate associated with a one-month increase (representing the underlying pre-disaster trend), <math>\beta_2</math> is the level change following the disaster (<math>t \geq</math> March 2011).</p>                                                                                                                                                                                                                                                                                                |
| <p><b>Change in level and trend</b></p> $Birth\ rate_t = exp(\beta_0 + \beta_1 T + \beta_2 D_t + \beta_3 T^* D_t)$ <p>T: the time in months at time <math>T = t</math> since the start of the observation; <math>D_t</math>: a dummy variable indicating the pre-disaster period (<math>D_t = 0</math> if <math>t \leq</math> February 2011) or the post-disaster period (<math>D_t = 1</math> if <math>t \geq</math> March 2011); <math>T^*</math>: the number of months after the disaster at time <math>T = t</math> (namely, <math>t -</math> February 2011); <b>Birth rate<sub>t</sub></b>: the monthly birth rate per people at <math>T = t</math>.</p> | <p>Here, <math>\beta_0</math> represents the intercept at <math>T = 0</math>, <math>\beta_1</math> is interpreted as the change in birth rate associated with a one-month increase (representing the underlying pre-disaster trend), <math>\beta_2</math> is the level change following the disaster (<math>t \geq</math> March 2011), <math>\beta_3</math> indicates the slope change following the disaster (representing the change in the trend, using the interaction between <math>T^*</math> and <math>D_t</math>: <math>T^* D_t</math>). The sum of <math>\beta_1</math> and <math>\beta_3</math> is the post-disaster trend.</p> |
| <p><b>Temporal level change (gap)</b></p> $Birth\ rate_t = exp(\beta_0 + \beta_1 T + \beta_2^* D_t^*)$ <p>T: the time in months at time <math>T = t</math> since the start of the observation; <math>D_t^*</math>: a dummy variable indicating the period during two years after the disaster (<math>D_t^* = 1</math> if <math>March\ 2011 \leq t \leq</math> February 2013) or not (<math>D_t^* = 0</math> if <math>t \leq</math> February 2011 or <math>t \geq</math> March 2013); <b>Birth rate<sub>t</sub></b>: the monthly birth rate per people at <math>T = t</math>.</p>                                                                              | <p>Here, <math>\beta_0</math> represents the intercept at <math>T = 0</math>, <math>\beta_1</math> is interpreted as the change in birth rate associated with a one-month increase (representing the underlying pre-</p>                                                                                                                                                                                                                                                                                                                                                                                                                  |

|                                                                                                                                                                                                                                                                                                                                                                                                                                                                                                                                                                                                                                                                                                                                                                                                                                                                                                                                                                                                                                                                                                                                                                                                                             |                                                                                                                                                                                                                                                                                                                                                                                                                                                                                                                                                                                                                                                                                                                                                   |
|-----------------------------------------------------------------------------------------------------------------------------------------------------------------------------------------------------------------------------------------------------------------------------------------------------------------------------------------------------------------------------------------------------------------------------------------------------------------------------------------------------------------------------------------------------------------------------------------------------------------------------------------------------------------------------------------------------------------------------------------------------------------------------------------------------------------------------------------------------------------------------------------------------------------------------------------------------------------------------------------------------------------------------------------------------------------------------------------------------------------------------------------------------------------------------------------------------------------------------|---------------------------------------------------------------------------------------------------------------------------------------------------------------------------------------------------------------------------------------------------------------------------------------------------------------------------------------------------------------------------------------------------------------------------------------------------------------------------------------------------------------------------------------------------------------------------------------------------------------------------------------------------------------------------------------------------------------------------------------------------|
|                                                                                                                                                                                                                                                                                                                                                                                                                                                                                                                                                                                                                                                                                                                                                                                                                                                                                                                                                                                                                                                                                                                                                                                                                             | <p>disaster trend), <math>\beta_2^*</math> is the temporal level change during two years after the disaster (March 2011 <math>\leq t \leq</math> February 2013).</p>                                                                                                                                                                                                                                                                                                                                                                                                                                                                                                                                                                              |
| <p><b>Gap + change in trend at two years after the disaster</b></p> <p><b><math>Birth\ rate_t = \exp(\beta_0 + \beta_1 T + \beta_2^* D_t^* + \beta_3^* T^{**} D_t^{**})</math></b></p> <p>T: the time in months at time <math>T = t</math> since the start of the observation; <math>D_t^*</math>: a dummy variable indicating the period during two years after the disaster (<math>D_t^* = 1</math> if March 2011 <math>\leq t \leq</math> February 2013) or not (<math>D_t^* = 0</math> if <math>t \leq</math> February 2011 or <math>t \geq</math> March 2013); <math>T^{**}</math>: the number of months since the two years after the disaster at time <math>T = t</math> (namely, <math>t -</math> February 2013); <math>D_t^{**}</math>: a dummy variable indicating the period since two years after the disaster (<math>D_t^{**} = 1</math> if March 2013 <math>\leq t</math>) or before (<math>D_t^{**} = 0</math> if <math>t \leq</math> February 2013); <b><math>Birth\ rate_t</math></b>: the monthly birth rate per people at <math>T = t</math>.</p>                                                                                                                                                        | <p>Here, <math>\beta_0</math> represents the intercept at <math>T = 0</math>, <math>\beta_1</math> is interpreted as the change in birth rate associated with a one-month increase (representing the underlying pre-disaster trend), <math>\beta_2^*</math> is the temporal level change during two years after the disaster (March 2011 <math>\leq t \leq</math> February 2013), <math>\beta_3^*</math> indicates the slope change since the two years after the disaster (representing the change in the trend, using the interaction between <math>T^{**}</math> and <math>D_t^{**}</math>: <math>T^{**} D_t^{**}</math>). The sum of <math>\beta_1</math> and <math>\beta_3^*</math> is the trend since the two years after the disaster.</p> |
| <p><b>Gap + changes in trends at the disaster and two years after</b></p> <p><b><math>Birth\ rate_t = \exp(\beta_0 + \beta_1 T + \beta_2^* D_t^* + \beta_3 T^* D_t + \beta_3^* T^{**} D_t^{**})</math></b></p> <p>T: the time in months at time <math>T = t</math> since the start of the observation; <math>D_t^*</math>: a dummy variable indicating the period during two years after the disaster (<math>D_t^* = 1</math> if March 2011 <math>\leq t \leq</math> February 2013) or not (<math>D_t^* = 0</math> if <math>t \leq</math> February 2011 or <math>t \geq</math> March 2013); <math>T^*</math>: the number of months after the disaster at time <math>T = t</math> (namely, <math>t -</math> February 2011); <math>T^{**}</math>: the number of months since the two years after the disaster at time <math>T = t</math> (namely, <math>t -</math> February 2013); <math>D_t^{**}</math>: a dummy variable indicating the period since two years after the disaster (<math>D_t^{**} = 1</math> if March 2013 <math>\leq t</math>) or before (<math>D_t^{**} = 0</math> if <math>t \leq</math> February 2013); <b><math>Birth\ rate_t</math></b>: the monthly birth rate per people at <math>T = t</math>.</p> | <p>Here, <math>\beta_0</math> represents the intercept at <math>T = 0</math>, <math>\beta_1</math> is interpreted as the change in birth rate associated with a one-month increase (representing the underlying pre-disaster trend), <math>\beta_2^*</math> is the temporal level change during two years after the disaster (March 2011 <math>\leq t \leq</math> February 2013), <math>\beta_3</math> indicates the slope change following the disaster (representing the change in the</p>                                                                                                                                                                                                                                                      |

trend, using the interaction between  $T^*$  and  $D_t$ :  $T^*D_t$ ),  $\beta_3^*$  indicates the slope change since the two years after the disaster (representing the change in the trend, using the interaction between  $T^{**}$  and  $D_t^{**}$ :  $T^{**}D_t^{**}$ ). The sum of  $\beta_1$  and  $\beta_3$  is the trend during two years after the disaster. The sum of  $\beta_1$ ,  $\beta_3$ , and  $\beta_3^*$  is the trend since the two years after the disaster.

Seasonality adjustment was applied by including (1) the indicator variable of calendar month ( $\beta_4 T_{feb} + \beta_5 T_{march} + \beta_6 T_{apr} + \beta_7 T_{may} + \beta_8 T_{jun} + \beta_9 T_{jul} + \beta_{10} T_{aug} + \beta_{11} T_{sep} + \beta_{12} T_{oct} + \beta_{13} T_{nov} + \beta_{14} T_{dec}$ ), where  $T_i$  indicates a dummy variable indicating calendar month  $i$  (e.g. if  $T$  = February 2011, then  $T_{feb} = 1$ , and  $T_i = 0$  for  $i$  = month other than January and February), or (2) sine and cosine pairs [ $\beta_4 \sin(2\pi \times t/12) + \beta_5 \cos(2\pi \times t/12) + \beta_6 \sin(4\pi \times t/12) + \beta_7 \cos(4\pi \times t/12)$ ], where  $t$  indicates secular 12 months].

**eFigure 1.** Trend in Birth Rates Estimated From Interrupted Time Series Analysis

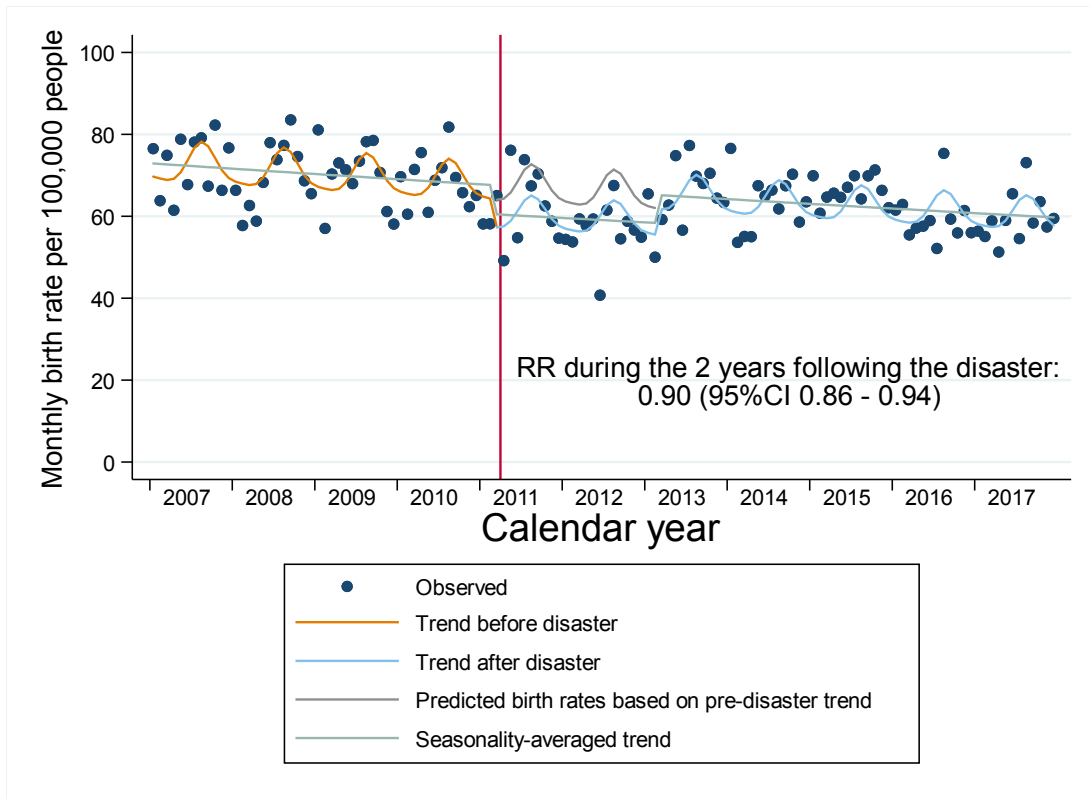

The trend in birth rates was estimated using the Poisson regression model, including temporal level change (gap) and sine and cosine pairs [ $\sin(2\pi \times t/12)$ ,  $\cos(2\pi \times t/12)$ ,  $\sin(4\pi \times t/12)$ , and  $\cos(4\pi \times t/12)$ ]. The dots indicate observed birth rates. The vertical line indicates the time of the Fukushima Daiichi Nuclear Power Plant disaster between February and March 2011. The trend before the disaster suggests a long-term trend of declining birth rate with seasonal change (rate ratio [RR] for 1 year: 0.98, 95% confidence interval [95%CI]: 0.98 - 0.99). Two years after the disaster, the birth rate seemingly dropped (RR during the 2 years: 0.90, 95%CI 0.86 - 0.94). RR: rate ratio, 95%CI: 95% confidence interval.

**eTable 2.** Values of Akaike Information Criterion and Bayesian Information Criterion Calculated From Impact Models for Interrupted Time Series Analysis Using Trimonthly-Averaged Data

| <b>Lists of the impact model used in this study</b>                                                   | <b>N of parameter</b> | <b>AIC</b> | <b>BIC</b> |
|-------------------------------------------------------------------------------------------------------|-----------------------|------------|------------|
| <b>Change in level</b>                                                                                | 3                     | 361.2      | 366.6      |
| <b>Change in level + seasonality adjustment (indicator)</b>                                           | 6                     | 356.5      | 367.3      |
| <b>Change in level and trend</b>                                                                      | 4                     | 361.9      | 369.1      |
| <b>Change in level and trend + seasonality adjustment (indicator)</b>                                 | 7                     | 356.8      | 369.5      |
| <b>Temporal level change (gap)</b>                                                                    | 3                     | 351.4      | 356.8      |
| <b>Temporal level change (gap) + seasonality adjustment (indicator)</b>                               | 6                     | 346.7      | 357.6      |
| <b>Gap + change in trend at 2 years after the disaster</b>                                            | 4                     | 353.2      | 360.4      |
| <b>Gap + change in trend at 2 years after the disaster + seasonality adjustment (indicator)</b>       | 7                     | 348.7      | 361.3      |
| <b>Gap + changes in trends at the disaster and 2 years after</b>                                      | 5                     | 355.2      | 364.2      |
| <b>Gap + changes in trends at the disaster and 2 years after + seasonality adjustment (indicator)</b> | 8                     | 350.7      | 365.1      |

Poisson regression models with adjustment of scale parameter were used to estimate trimonthly-averaged birth rate. Change in level modeled intercept change after March 2011. Change in level and trend modeled intercept and slope changes after March 2011. Temporal level change (i.e., gap) modeled intercept change for the two years after March 2011. Gap plus changes in trends modeled gap plus slope changes after March 2011 and two years after March 2011. Seasonality adjustment was applied by including the indicator variable of the quarter (“indicator”). None of the changes in the trend component that added to the gap component were statistically significant. Taken together with this table, the model including temporal level change with seasonality adjustment is optimal. AIC: Akaike Information Criterion. BIC: Bayesian Information Criterion.

**eFigure 2.** Trend in Birth Rates Estimated From Interrupted Time Series Analysis Using Trimonthly-Averaged Data

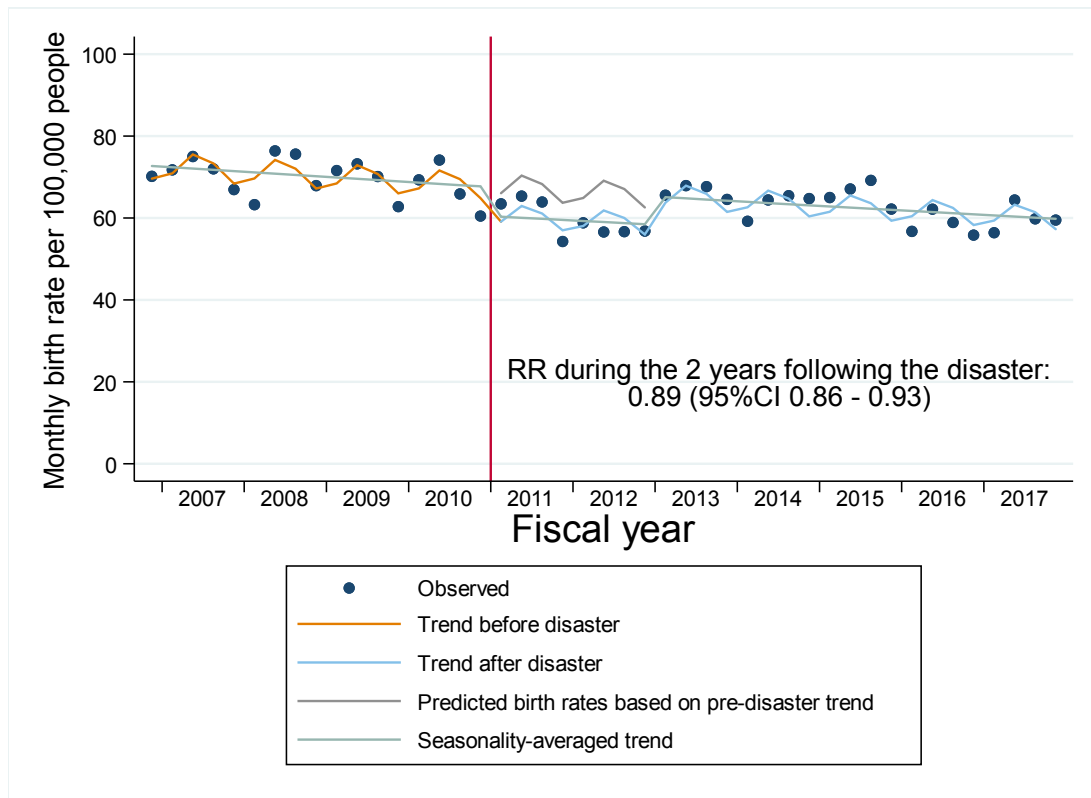

The trend in birth rates was estimated using the Poisson regression model, including temporal level change (gap) and the indicator variable of the quarter. The trend before the disaster suggests a long-term trend of declining birth rate with seasonal change (rate ratio [RR] for 1 year: 0.95, 95% confidence interval [95%CI]: 0.94 - 0.96). Two years after the disaster, birth rate seemingly dropped (RR during the 2 years: 0.89, 95%CI 0.86 - 0.93). The dots indicate observed birth rates. The vertical line indicates the time of the Fukushima Daiichi Nuclear Power Plant disaster between February and March 2011. RR: rate ratio, 95%CI: 95% confidence interval.
